# Supplementary material for: Development of greenhouse gas emissions baseline and identification of carbon offset cost for maritime vessels of a developing country
Source: Frontiers journal article supplement (doi:10.3389/fenvs.2022.1076585), 2023-01-04
Supplement: Data_Sheet_1.PDF [file Data_Sheet_1.PDF]

## SUPPLEMENTARY MATERIAL

**Manuscript ID: 1076585**

### **Development of Greenhouse Gas Emissions Baseline and Identification of Carbon Offset Cost for Maritime Vessels of a Developing Country**

Basra Semab, Kanwar Muhammad Javed Iqbal, Sarah Amir, Muhammad Atiq Ur Rehman Tariq

#### **Appendix-I: Glossary of Abbreviations**

|                  |                                                       |
|------------------|-------------------------------------------------------|
| AIS              | Automatic Identification System                       |
| CH <sub>4</sub>  | Methane                                               |
| CO <sub>2</sub>  | Carbon Dioxide                                        |
| CORINAIR         | Core Inventory of Air Emissions                       |
| EEA              | European Environment Agency                           |
| EMEP             | European Monitoring and Evaluation Programme          |
| g                | Gram                                                  |
| GHG              | Greenhouse gas                                        |
| GT               | Gross tonnage                                         |
| GWP              | Global Warming Potential                              |
| HFCs             | Hydrofluorocarbons                                    |
| HSD              | High speed diesel                                     |
| HT               | Hundred Tons                                          |
| IEA              | International Energy Agency                           |
| IMO              | International Maritime Organization                   |
| IPCC             | Intergovernmental Panel on Climate Change             |
| Kg               | Kilogram                                              |
| KPT              | Karachi Port Trust                                    |
| MGO              | Marine Gas Oil                                        |
| MPV              | Maritime Patrol Vessel                                |
| N <sub>2</sub> O | Nitrous Oxide                                         |
| NDC              | Nationally Determined Contributions                   |
| OBM              | Outboard motor                                        |
| PFCs             | Perfluorocarbons                                      |
| PMSA             | Pakistan Maritime Security Agency                     |
| PNSC             | Pakistan National Shipping Corporation                |
| Ppb              | Parts per billion                                     |
| Ppm              | Parts per million                                     |
| PQA              | Port Qasim Authority                                  |
| STEAM3           | Ship Traffic Emission Assessment Model                |
| TJ               | Terajoule                                             |
| UNFCCC           | United Nations Framework Convention on Climate Change |
| US-EPA           | United States Environmental Protection Agency         |
| VLSFO            | Very low sulfur fuel oil                              |
| WWF              | World Wildlife Fund                                   |

## Appendix-II: PNSC's Fleet (Seagoing Vessels Photos)

### Tankers

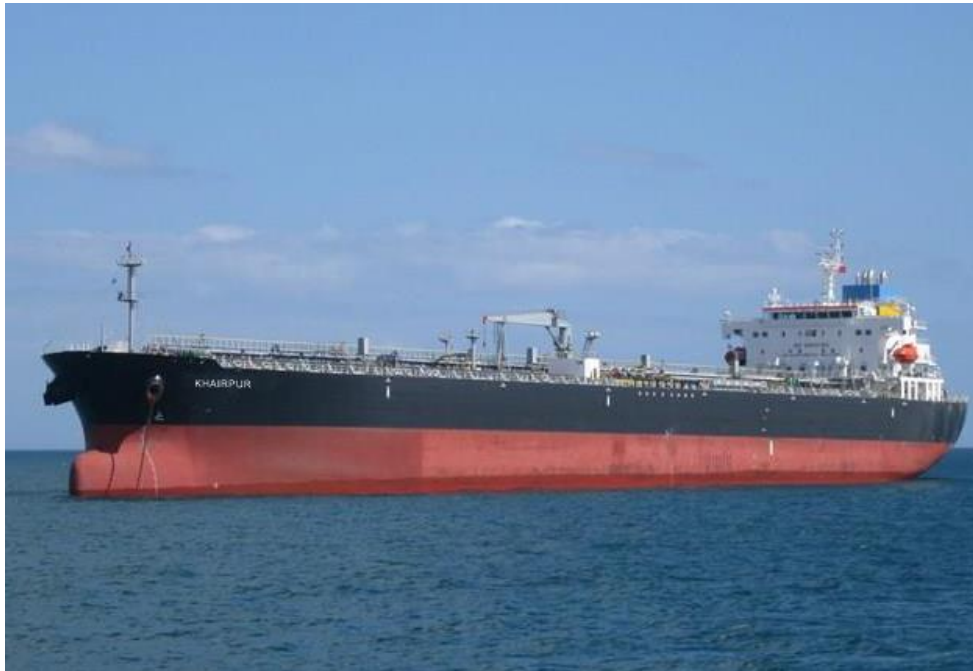

Figure 1: Khairpur (220.89m in Size)

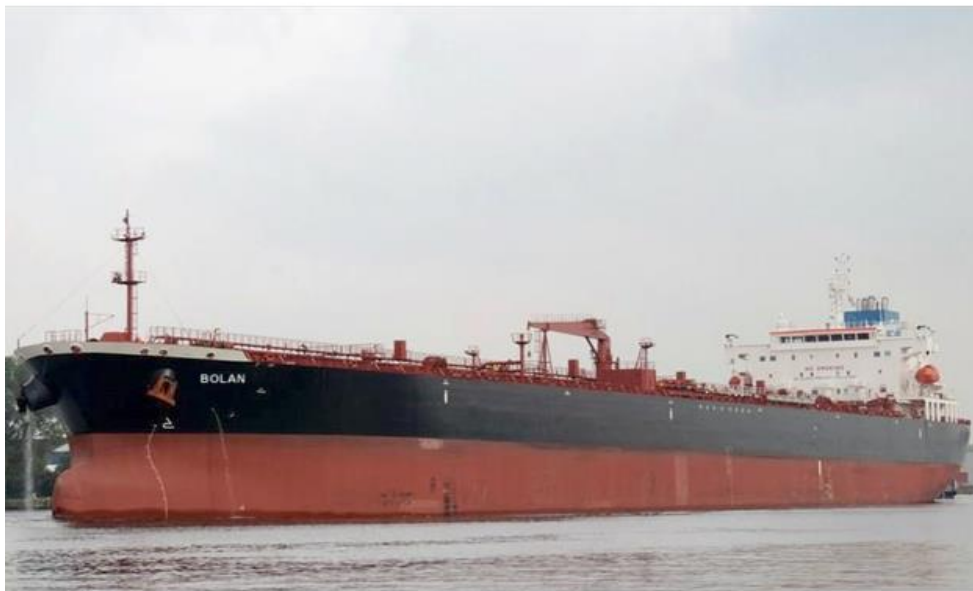

Figure 2: Bolan (220.89m in Size)

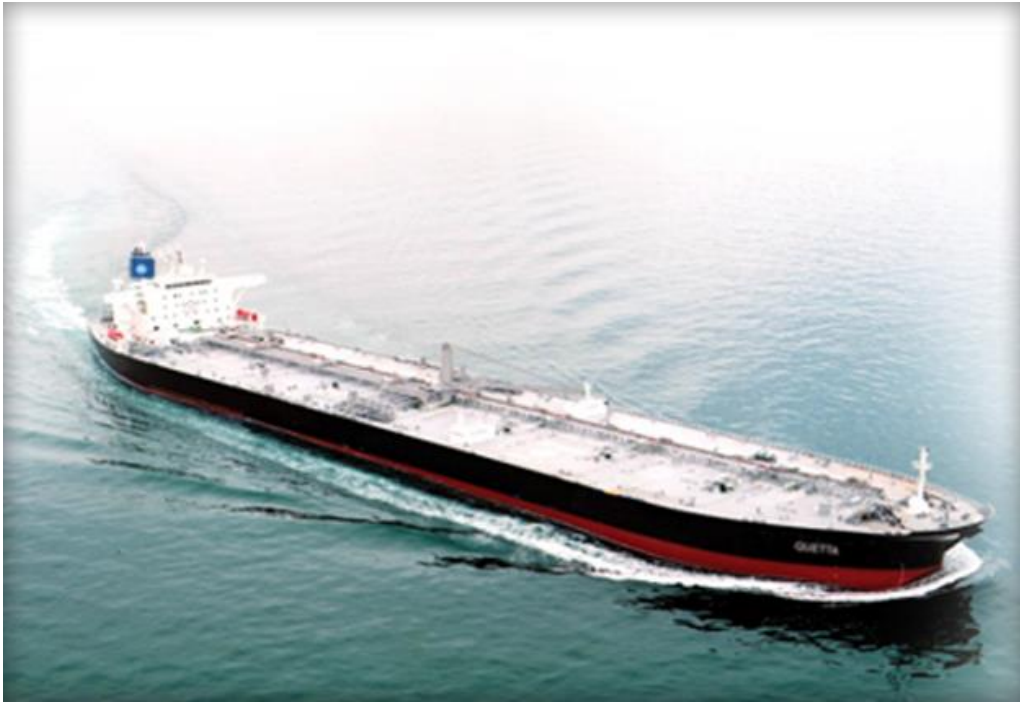

**Figure 3: Quetta (246.80m in Size)**

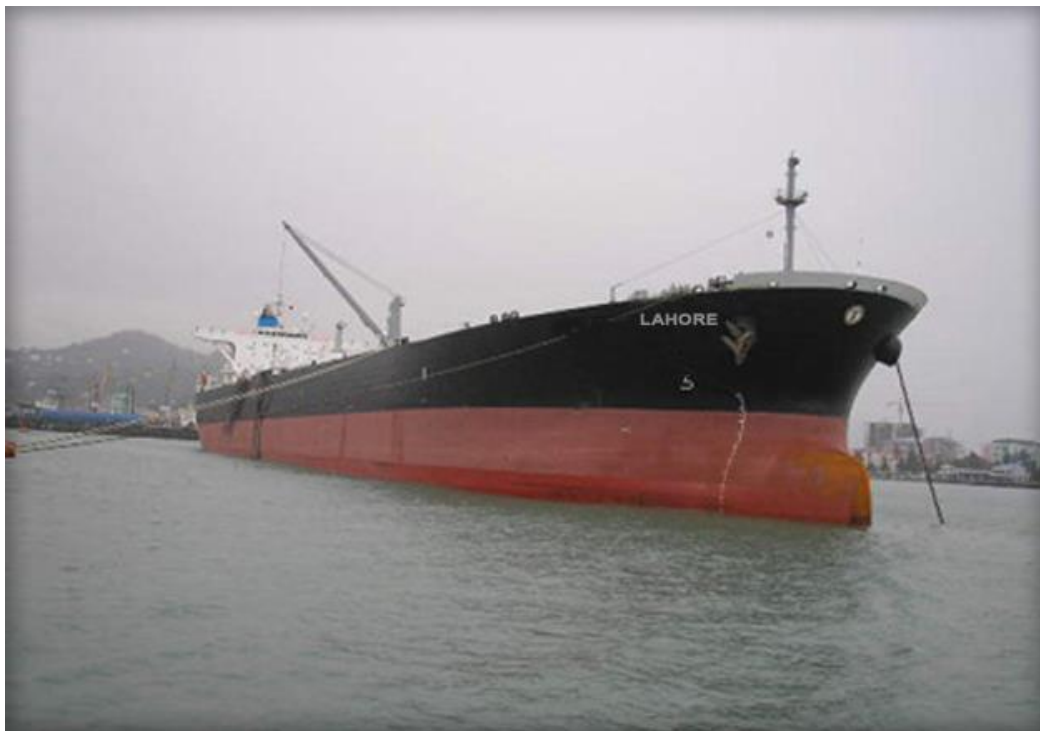

**Figure 4: Lahore (246.80m in Size)**

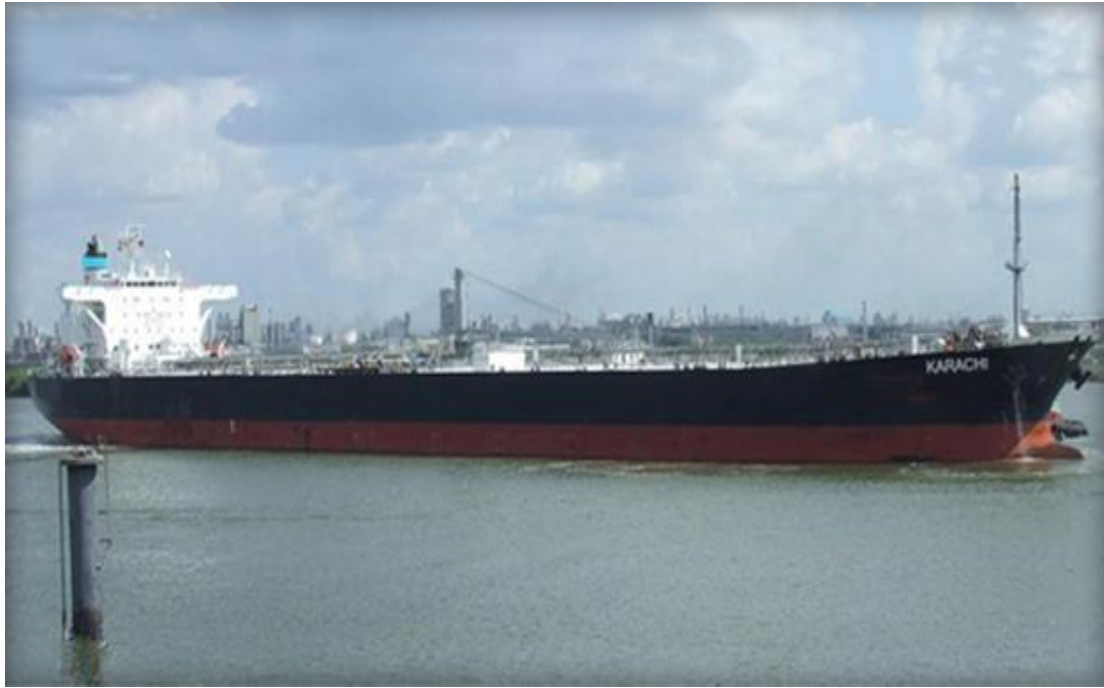

**Figure 5: Karachi (246.80m in Size)**

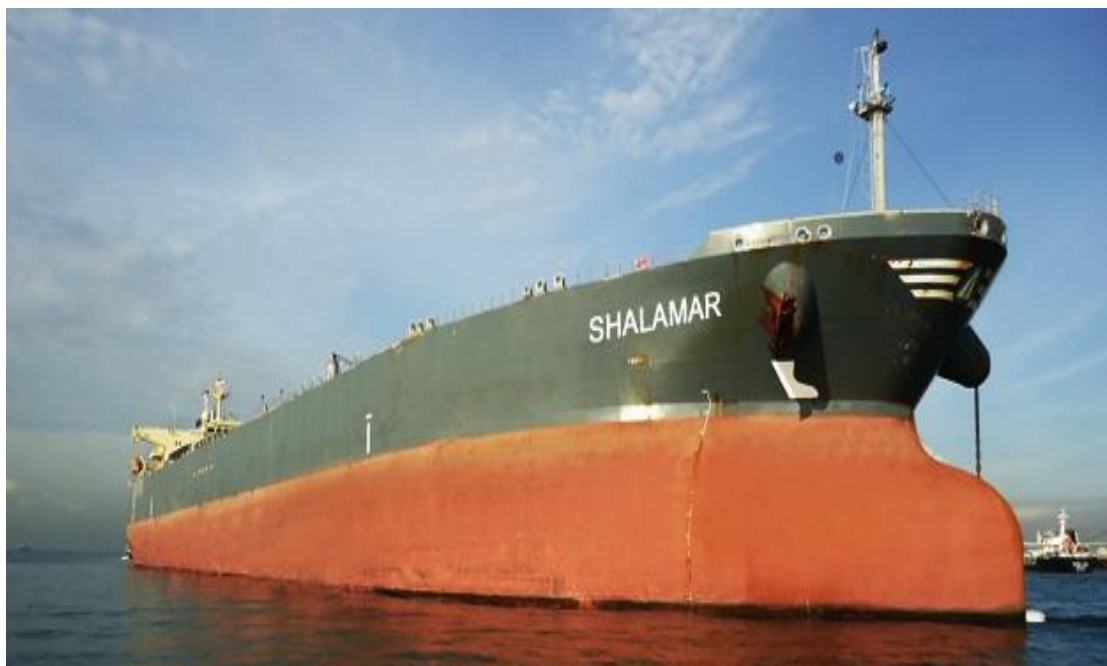

**Figure 6: Shalamar (228.6m in Size)**



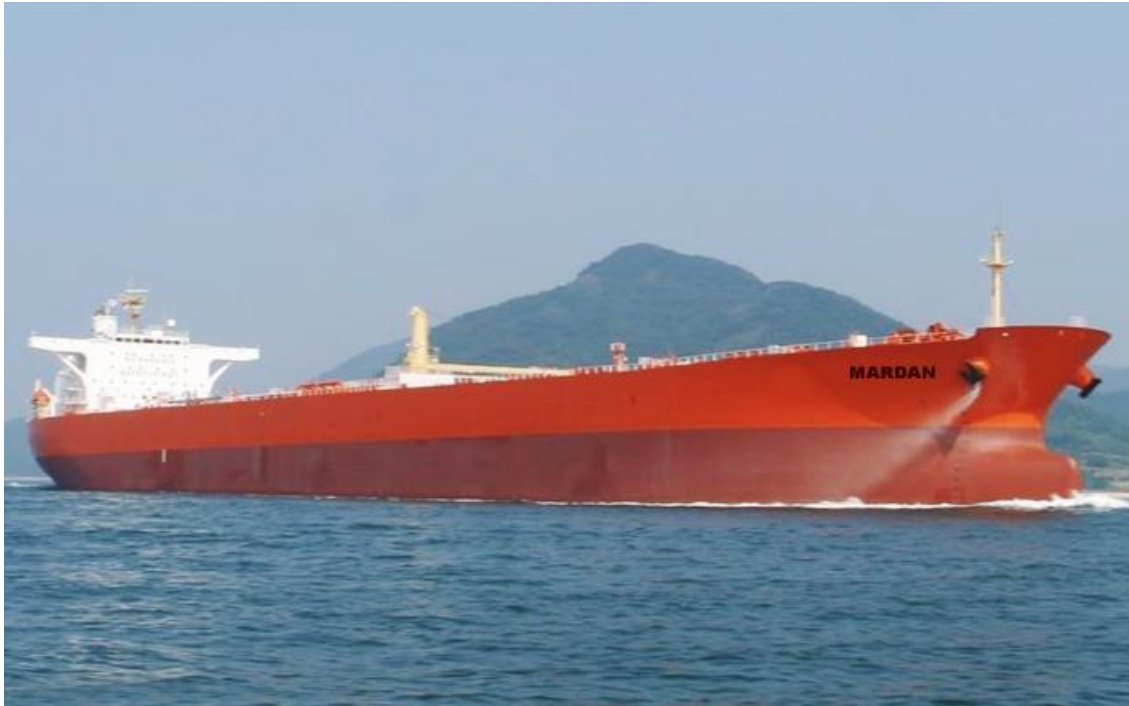

Figure 7: Mardan (246.80m in Size)

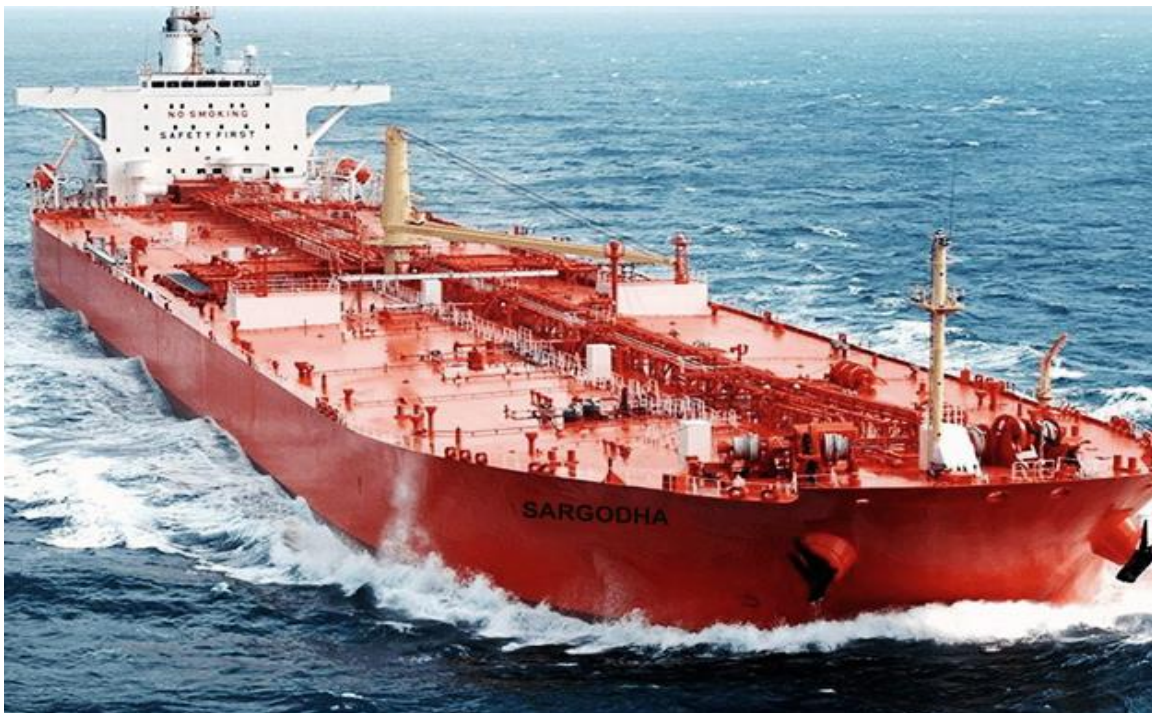

Figure 8: Sargodha (246.80m in Size)

## **Bulk Carriers**

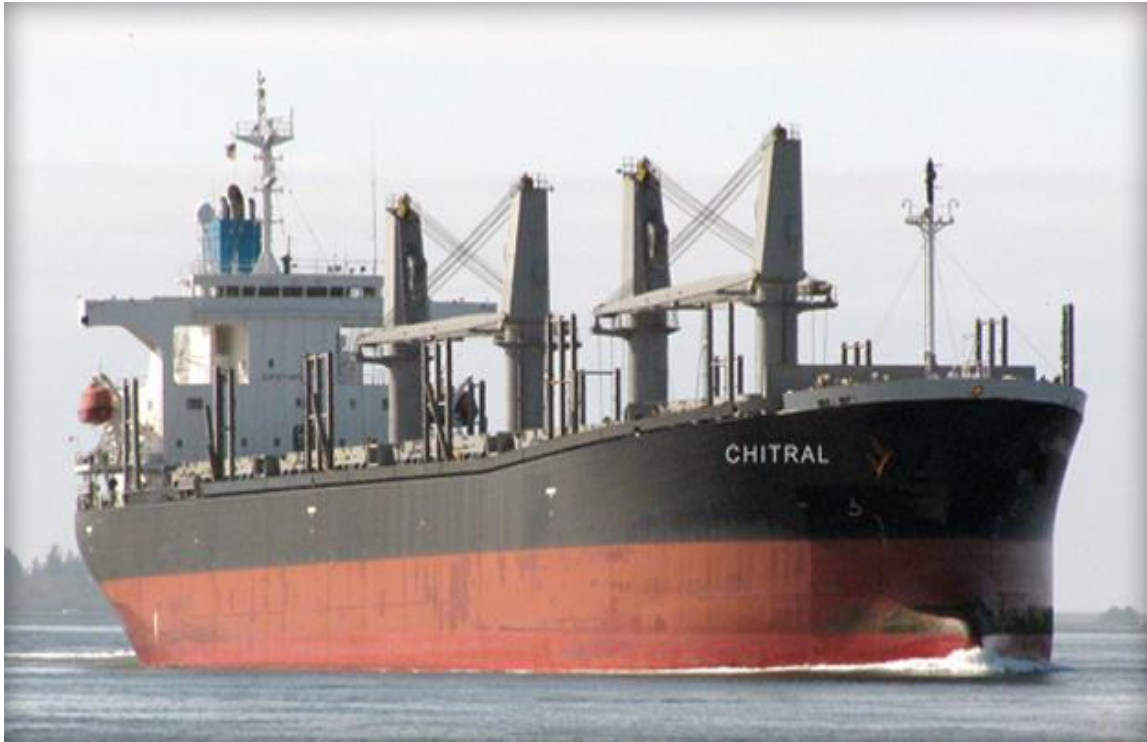

**Figure 9: Chitral (185.73m in Size)**

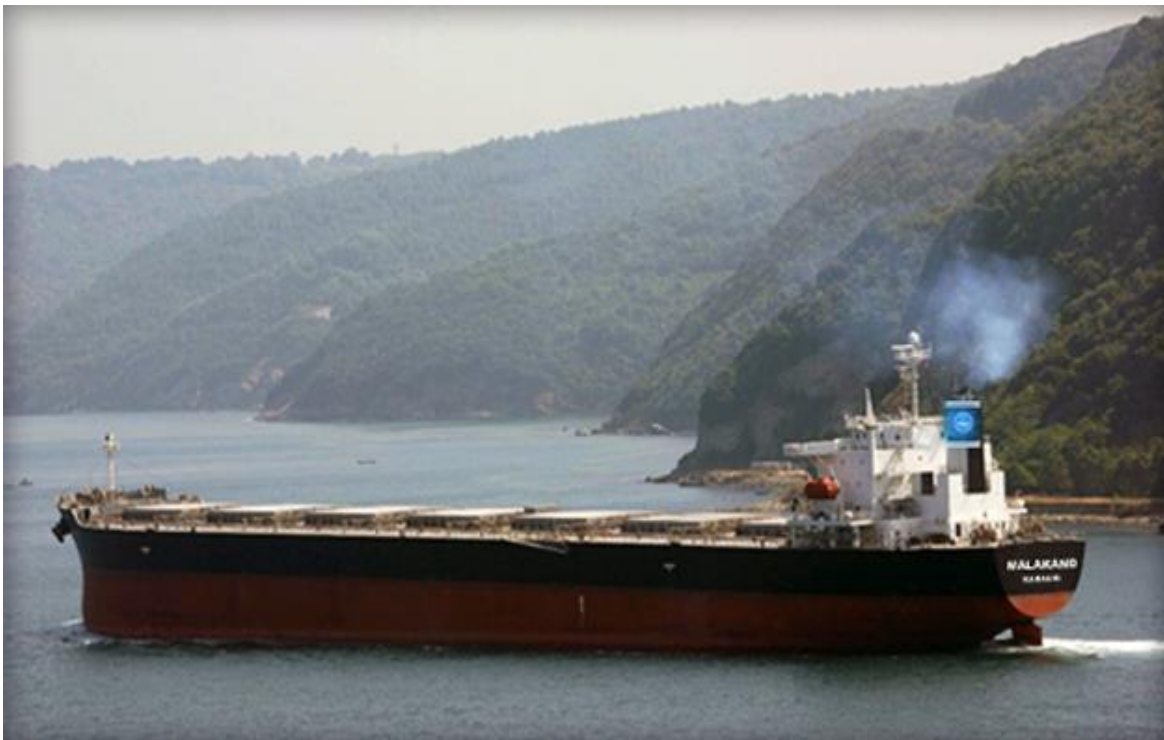

**Figure 10: Malakand (225m in Size)**



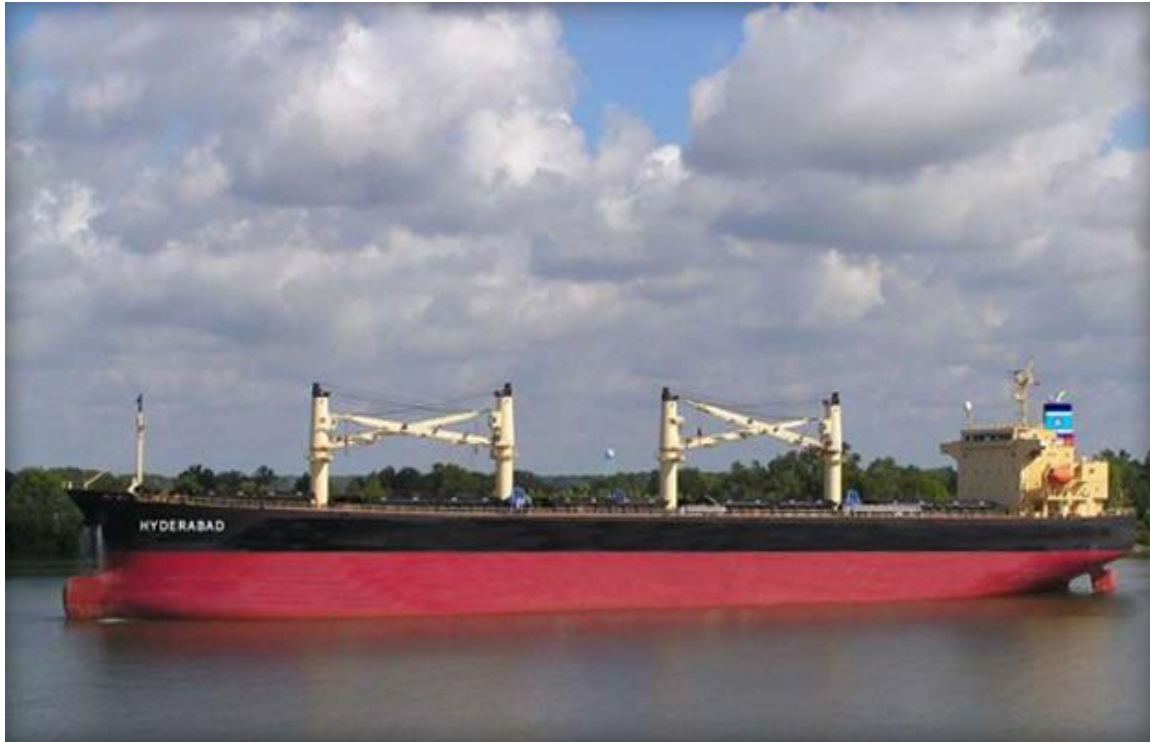

**Figure 11: Hyderabad (188.50m in Size)**

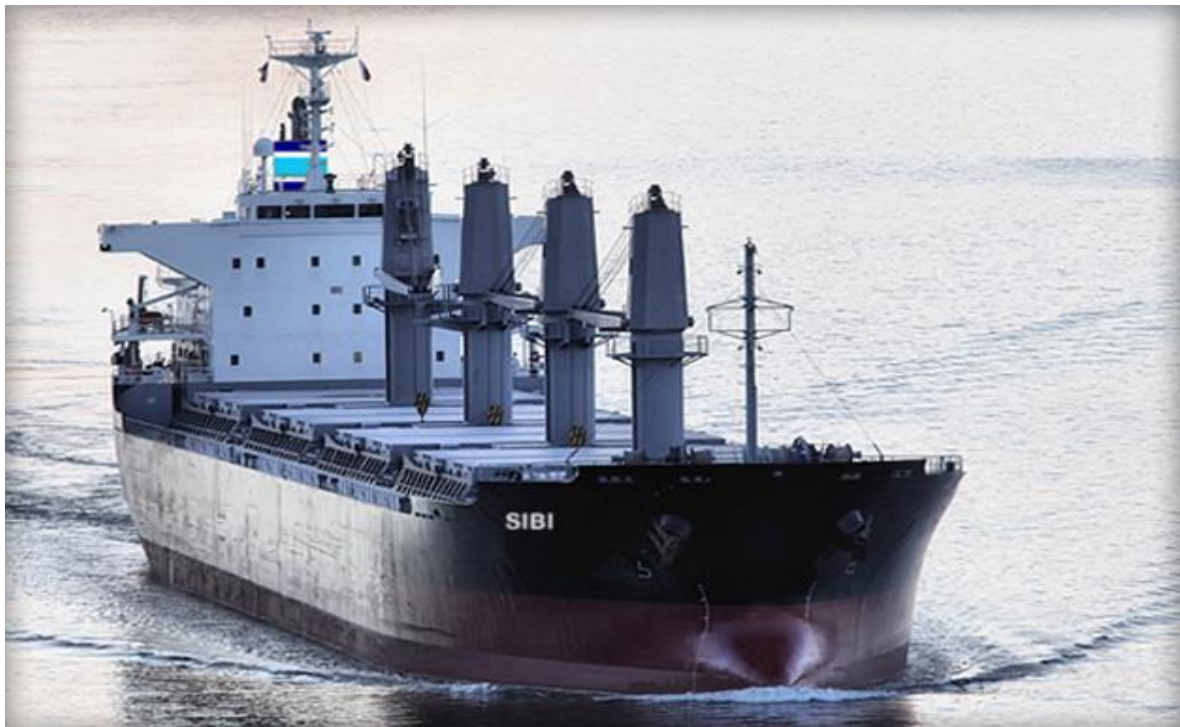

**Figure 12: Sibi (169.37m in Size)**

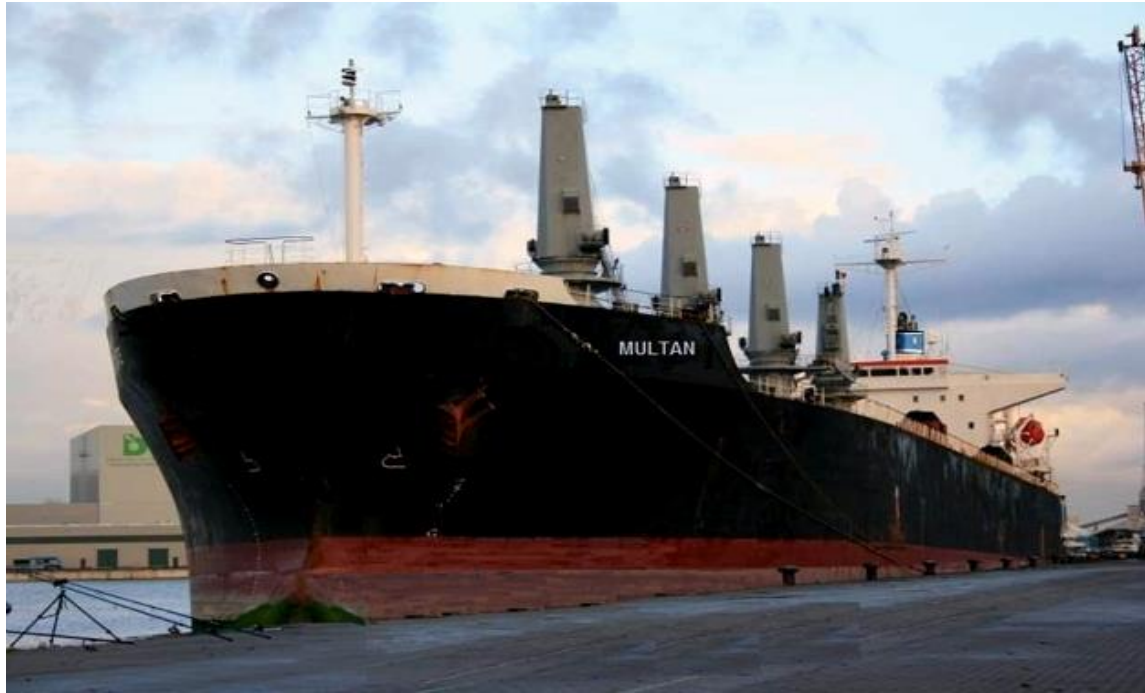

Figure 13: Multan (189.80m in Size)

## PMSA's Fleet

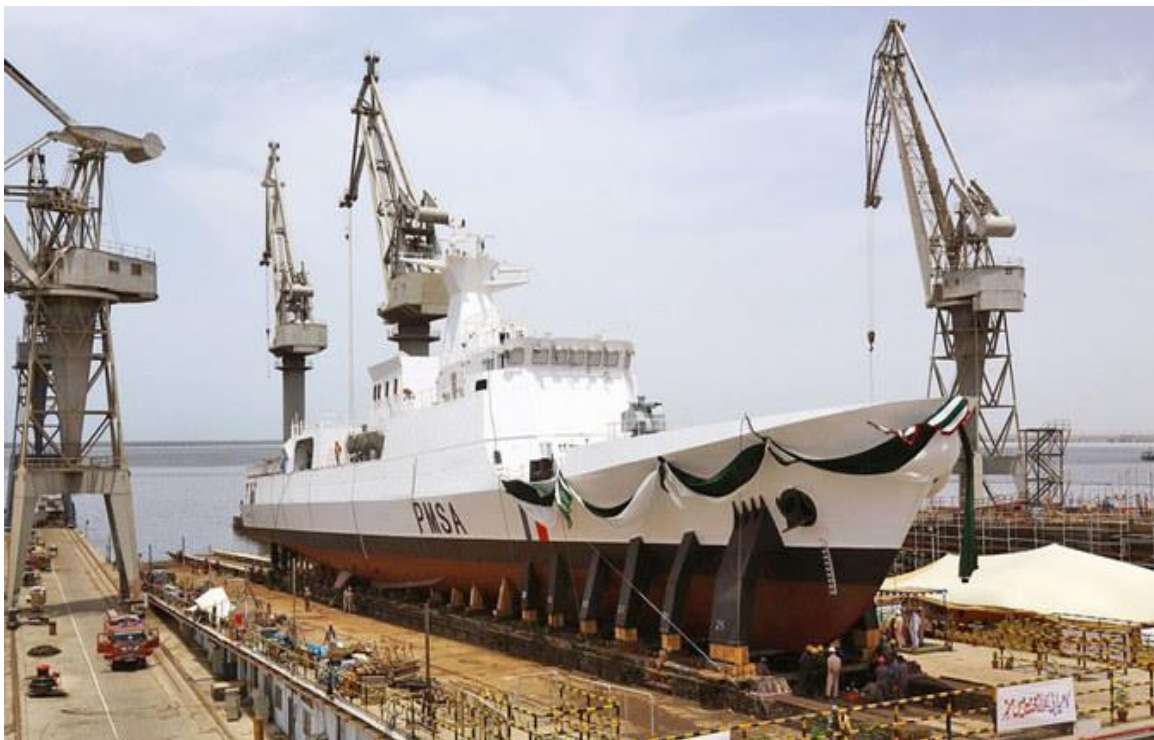

Figure 14: 15HT Maritime Patrol Vessel

(Source: <https://www.arabnews.com/node/1501131/press-review>)



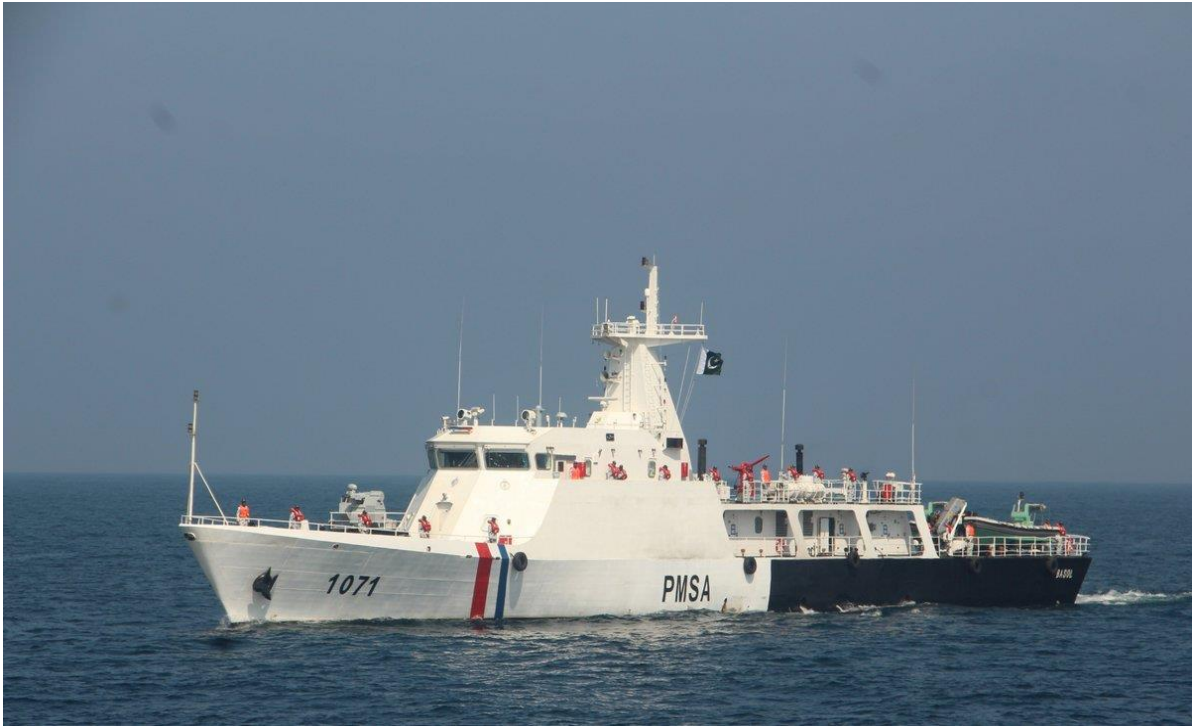

**Figure 15: 6HT Maritime Patrol Vessel**

(Source: <https://twitter.com/sohailahmedsa/status/1493879071456985088/photo/1>)

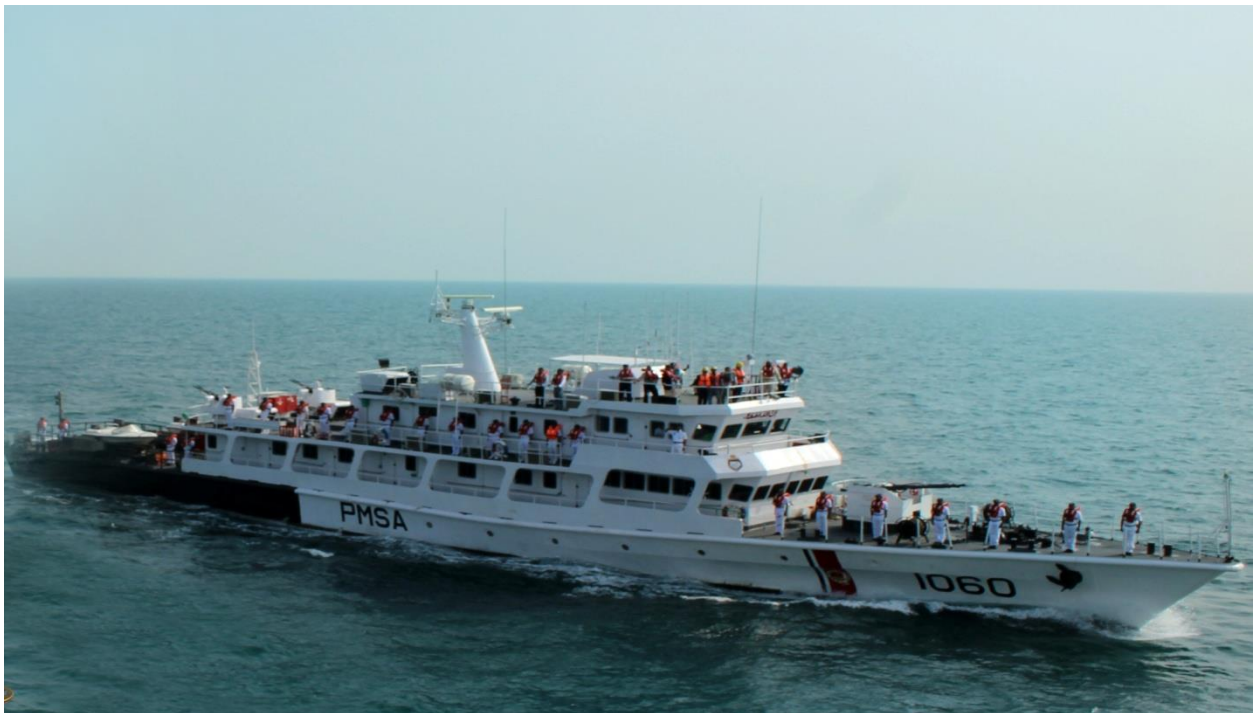

**Figure 16: Corvette (397 Tons)**

(Source: [https://pmsa.gov.pk/pmss\\_ship/osron22](https://pmsa.gov.pk/pmss_ship/osron22))

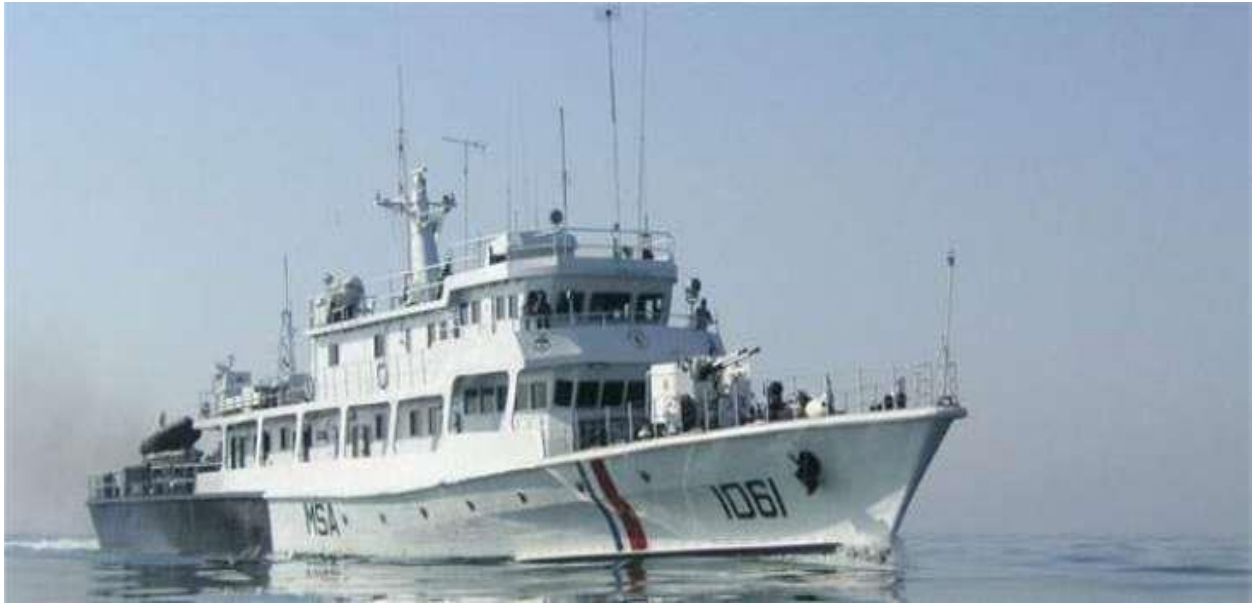

Figure 17: Island Class

(Source: <https://www.pakistanpoint.com/en/story/189827/island-class-ships-inducted-to-fleet-of-pmsa.html>)

## Harbour Crafts

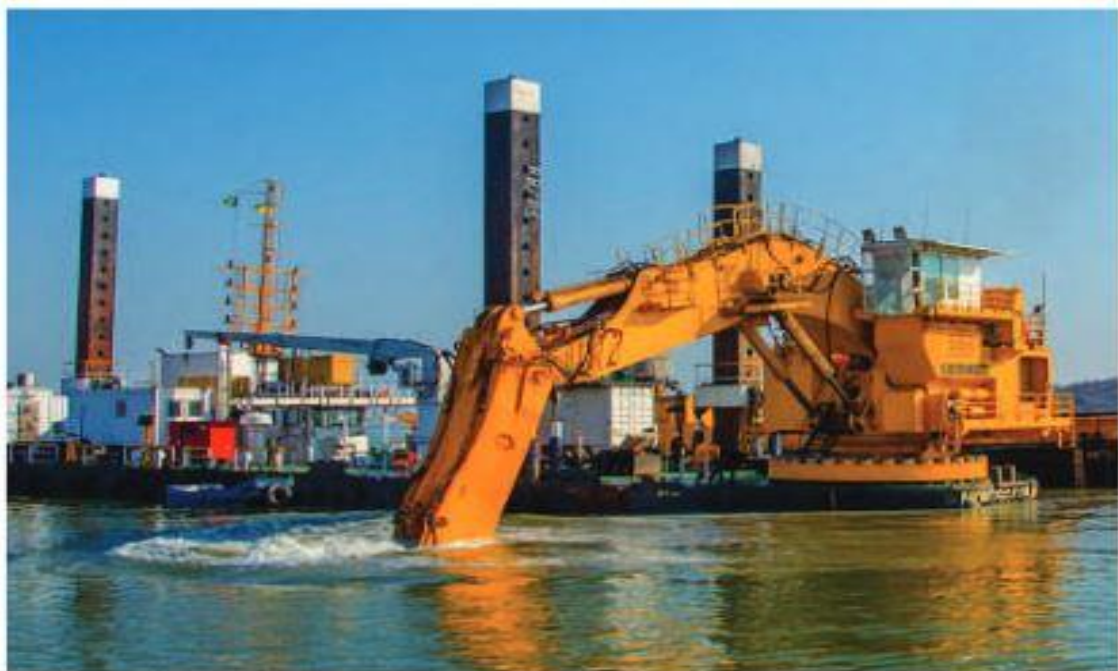

Figure 18: Dredgers

(Source: <https://kpt.gov.pk/news/87/kpt-invites-bids-for-capital-dredging>)

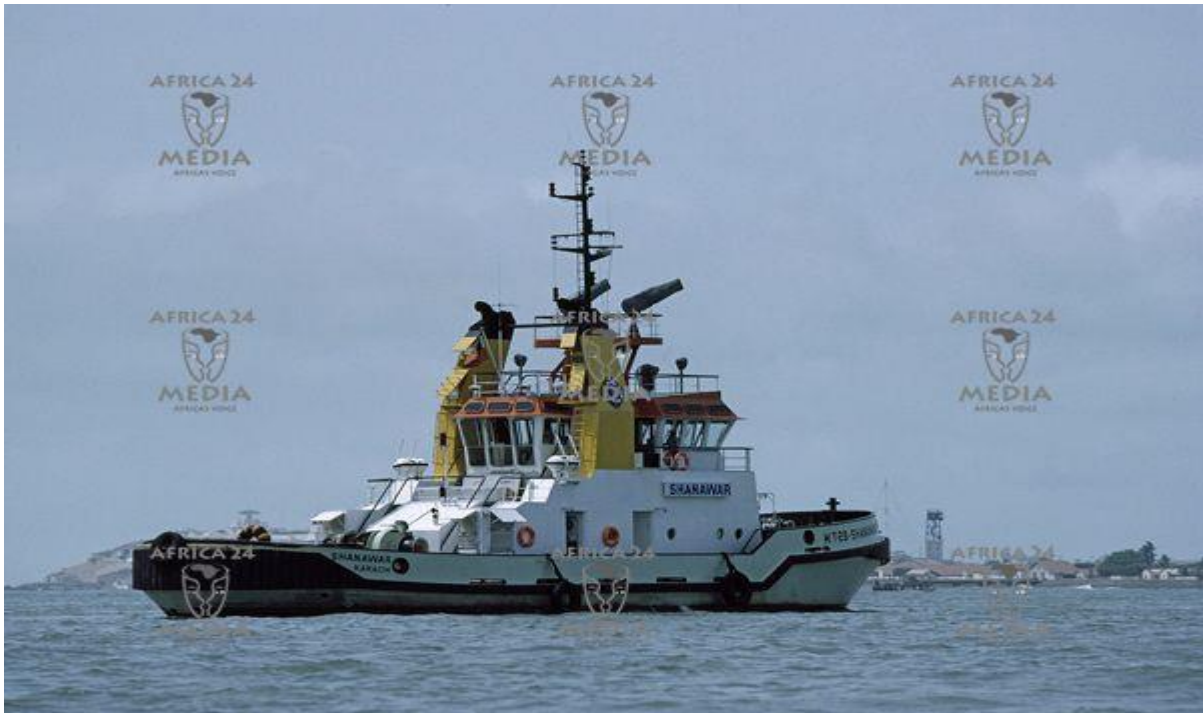

Figure 19: Tugs

(Source: <https://www.pinterest.com/pin/shanawar-one-of-karachi-ports-powerful-harbor-tugs--323625923192980324/>)

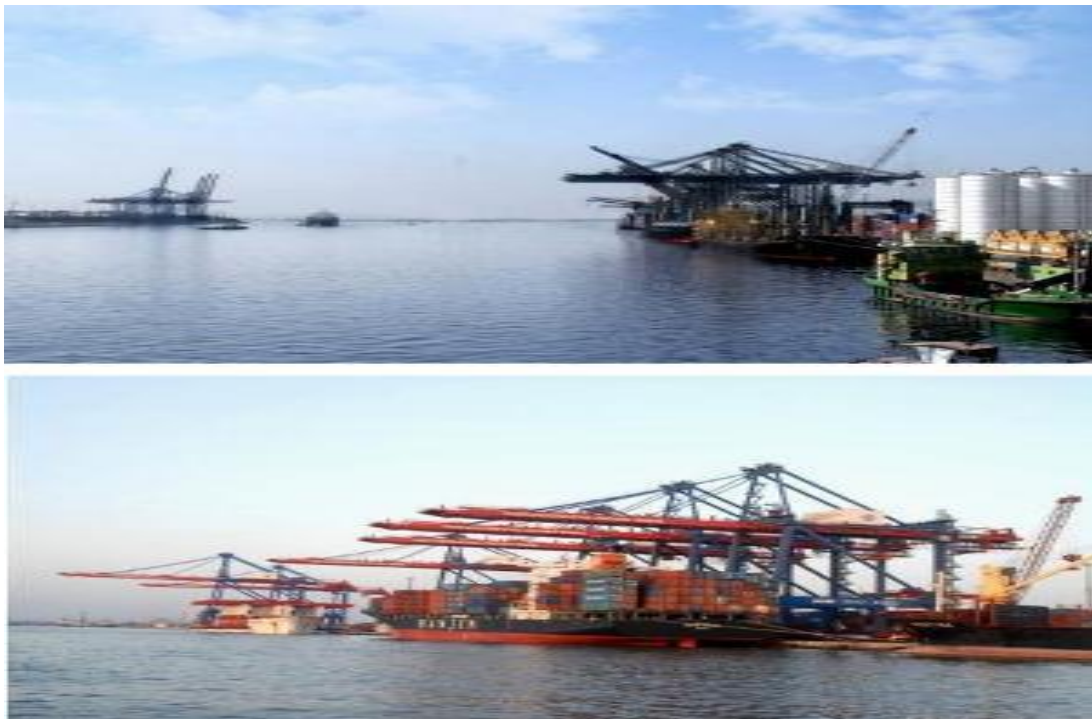

Figure 20: Barges

(Source: <https://kpt.gov.pk/pages/21/port-statistics>)



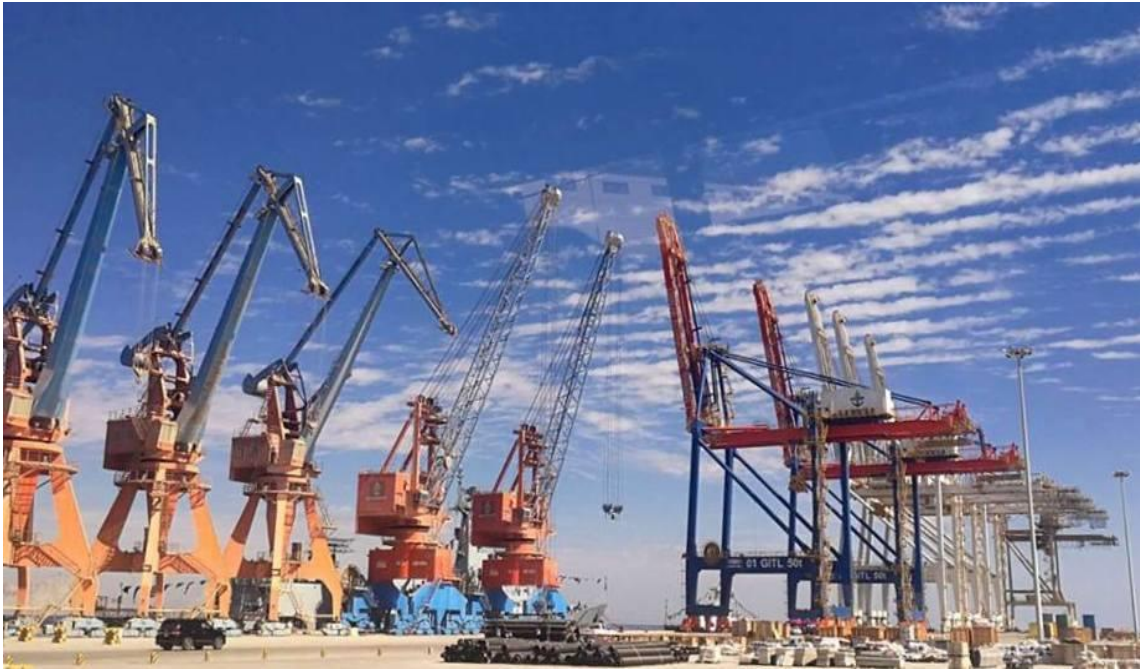

Figure 21: Floating Cranes  
(Source: [https://en.wikipedia.org/wiki/Gwadar\\_Port](https://en.wikipedia.org/wiki/Gwadar_Port))

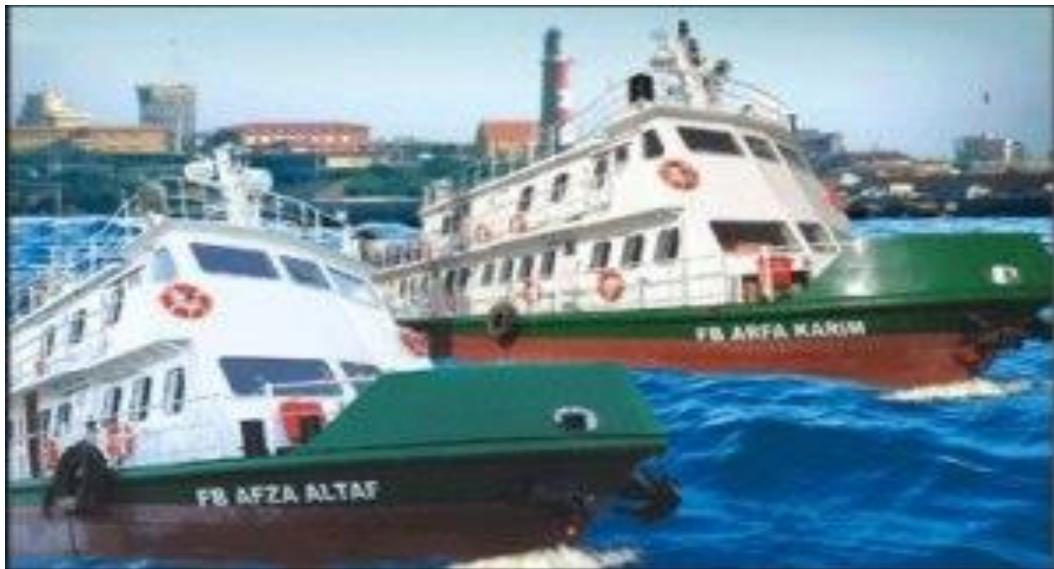

Figure 22: Ferry Boats  
(Source: <https://awamiweb.com/free-ferryboat-service-bw-manora-kemari-at-karachi-port-39532.html>)

## Fishing and other crafts

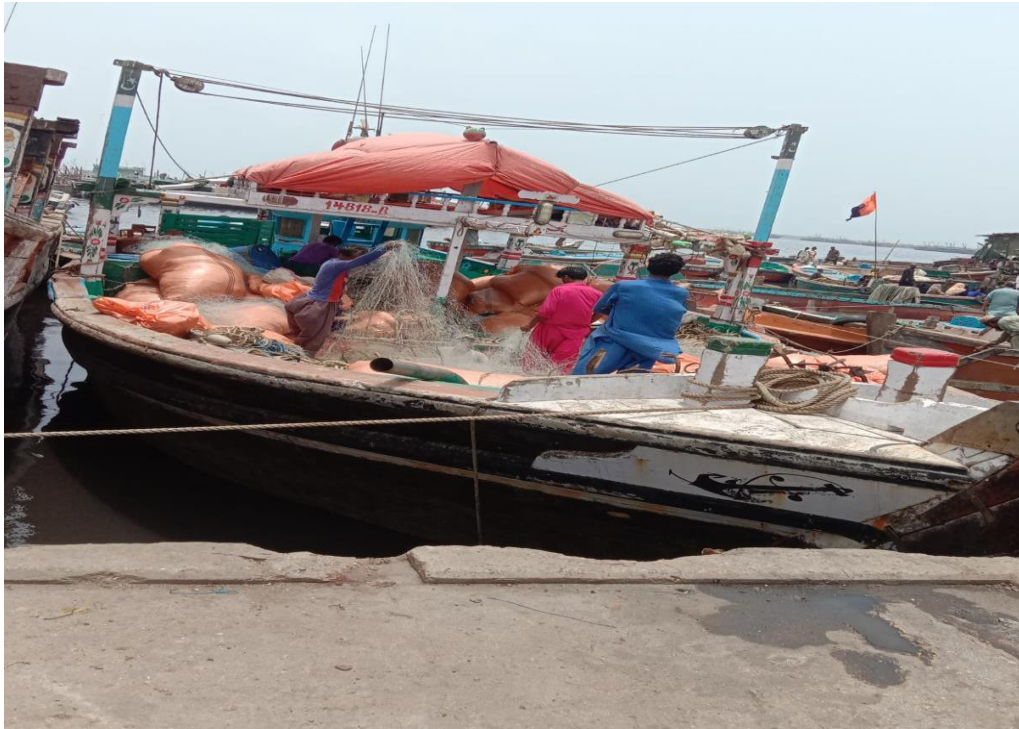

**Figure 23: Fishing Vessels**

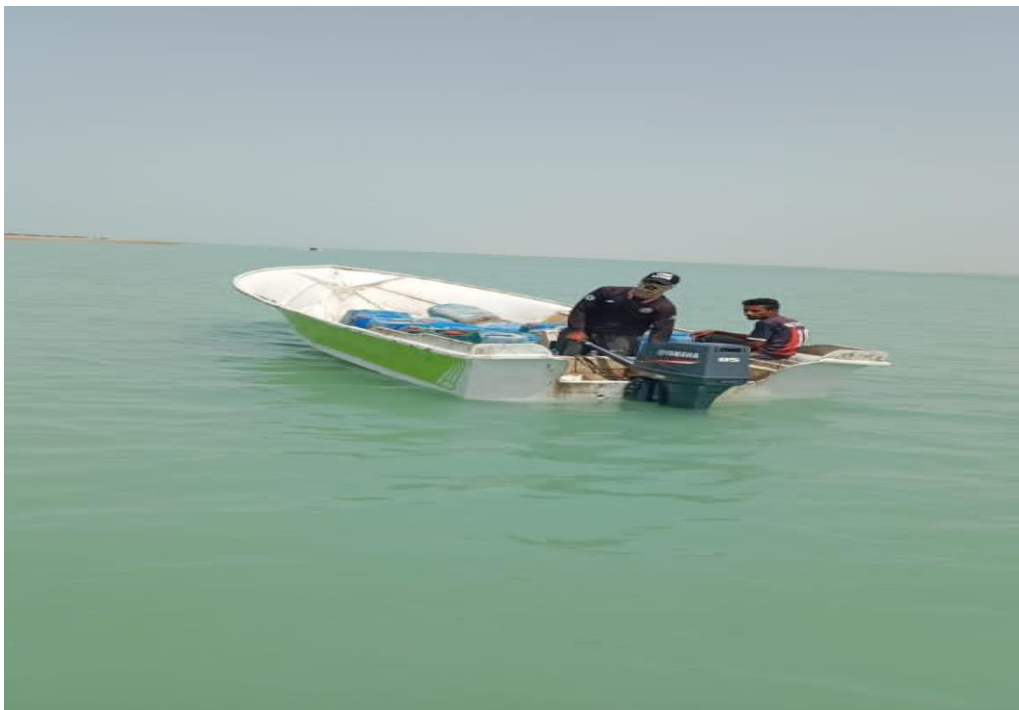

**Figure 24: Skiff Boat**
